# Supplementary material
Source: PubMed Central journal article supplement (PMC9003120)
Supplement: NIHMS1736809-supplement-2.pdf [file NIHMS1736809-supplement-2.pdf]

# CERT ✓ consensus on Exercise Reporting Template

## A Checklist for what to include when reporting exercise programs

| Section/Topic   | Item # | Checklist item                                                                                                                               | Primary paper (page, table, appendix) | Location ** (Other (paper or protocol, website (URL)) |
|-----------------|--------|----------------------------------------------------------------------------------------------------------------------------------------------|---------------------------------------|-------------------------------------------------------|
| WHAT: materials | 1      | Detailed description of the type of exercise equipment (e.g. weights, exercise equipment such as machines, treadmill, bicycle ergometer etc) | 7-8                                   |                                                       |
|                 | 2      | Detailed description of the qualifications, teaching/supervising expertise, and/or training undertaken by the exercise instructor            | 7                                     |                                                       |
| HOW: delivery   | 3      | Describe whether exercises are performed individually or in a group                                                                          | 7                                     |                                                       |
|                 | 4      | Describe whether exercises are supervised or unsupervised and how they are delivered                                                         | 7-9                                   |                                                       |
|                 | 5      | Detailed description of how adherence to exercise is measured and reported                                                                   | 9, 12                                 |                                                       |
|                 | 6      | Detailed description of motivation strategies                                                                                                | n/a                                   | protocol                                              |
|                 | 7a     | Detailed description of the decision rule(s) for determining exercise progression                                                            | 7                                     |                                                       |
|                 | 7b     | Detailed description of how the exercise program was progressed                                                                              | 7-8, Table 1                          |                                                       |
|                 | 8      | Detailed description of each exercise to enable replication (e.g. photographs, illustrations, video etc)                                     | 7-8                                   | protocol                                              |
|                 | 9      | Detailed description of any home program component (e.g. other exercises, stretching etc)                                                    | n/a                                   |                                                       |
|                 | 10     | Describe whether there are any non-exercise components (e.g. education, cognitive behavioural therapy, massage etc)                          | n/a                                   |                                                       |
|                 | 11     | Describe the type and number of adverse events that occurred during exercise                                                                 | 13                                    |                                                       |

|                           |     |                                                                                                                                                                                    |       |
|---------------------------|-----|------------------------------------------------------------------------------------------------------------------------------------------------------------------------------------|-------|
| WHERE: location           | 12  | Describe the setting in which the exercises are performed                                                                                                                          | 6     |
| WHEN, HOW MUCH: dosage    | 13  | Detailed description of the exercise intervention including, but not limited to, number of exercise repetitions/sets/sessions, session duration, intervention/program duration etc | 7-9   |
| TAILORING: what, how      | 14a | Describe whether the exercises are generic (one size fits all) or tailored whether tailored to the individual                                                                      | 7     |
|                           | 14b | Detailed description of how exercises are tailored to the individual                                                                                                               | 12-13 |
|                           | 15  | Describe the decision rule for determining the starting level at which people commence an exercise program (such as beginner, intermediate, advanced etc)                          | 7     |
| HOW WELL: planned, actual | 16a | Describe how adherence or fidelity to the exercise intervention is assessed/measured                                                                                               | 12-13 |
|                           | 16b | Describe the extent to which the intervention was delivered as planned                                                                                                             | 12-13 |

\*It is recommended that this checklist is used in conjunction with the Explanation and Elaboration Statement which is a guide each item in the CERT Checklist

The CERT Checklist is designed for reporting details of an exercise intervention. The CERT Checklist should be used in conjunction with a reporting checklist appropriate for the study type e.g. the CONSORT Statement ([www.consort-statement.org](http://www.consort-statement.org)) for randomised controlled trials, the SPIRIT Statement ([www.spirit-statement.org](http://www.spirit-statement.org)) for a clinical trial protocol. For further guidance regarding reporting guidelines please consult the EQUATOR network ([www.equator-network.org](http://www.equator-network.org))

\*\* Authors – please use N/A if an item is not applicable      Reviewers – please use “?” if information is not provided or not/insufficiently reported

† If the information is not provided in the primary paper that is under consideration, please provide details of where this information is available e.g. in a published protocol, published papers (provide citation details) or on a website (provide the URL).

Handwritten notes in the right margin:

4. 12-13

5. 12-13

6. 12-13
